# Supplementary material
Source: Royal Society of Chemistry journal article supplement (doi:10.1039/d6ce00138f)
Supplement: d6ce00138f1.pdf [file d6ce00138f1.pdf]

# Syntheses, Crystal Structure, and Photochromic Properties of a New Stable Ti (IV) Complex

Zeng-Ni Xiang <sup>a, 1</sup>, Jin-Ping Zhao <sup>a, 1</sup>, Zhong-Mei Xian <sup>a</sup>, Mei-Yu Xu <sup>a\*</sup>, Zhong-Hua Wang <sup>a\*</sup> and  
Guang-Ming Liang <sup>a\*</sup>

<sup>a</sup> *Precise Synthesis and Function Development Key Laboratory of Sichuan Province, College of Chemistry and Chemical Engineering, China West Normal University, Nanchong 637002, China.*

<sup>1</sup> *These authors contributed equally to this work.*

*Corresponding Author*

*E-mail for Mei-Yu Xu: 563977182@qq.com;*

*E-mail for Zhong-Hua Wang: zhwangs@163.com;*

*E-mail for Guang-Ming Liang: lianggm1129@cwnu.edu.cn*

## Table of Contents

|                                                                 |           |              |
|-----------------------------------------------------------------|-----------|--------------|
| <b>Experimental Section</b>                                     | <b>S2</b> |              |
| <b>Figures Related to SEM, EDS, IR, and TGA of Ti-PDA</b>       |           | <b>S3</b>    |
| <b>Figures Related to XPS, XRD, EPR of Ti-PDA</b>               |           | <b>S4-S7</b> |
| <b>Figures Related to Ultraviolet spectra of MO degradation</b> |           | <b>S6</b>    |
| <b>Figures Related to Five cycles of Ti-PDA</b>                 |           | <b>S7</b>    |
| <b>Table S1</b>                                                 | <b>S8</b> |              |

## EXPERIMENTAL SECTION

**Materials and Methods.** All the chemical reagents used in this work were purchased from Aladdin and used without further purification. Fourier-transform IR spectra were recorded on a Perkin-Elmer FT-IR spectrometer in the range of 4000-400  $\text{cm}^{-1}$ . Thermogravimetric analyses (TGA) plots were conducted on a Perkin-Elmer TGA-7 from 25-1000  $^{\circ}\text{C}$  in an  $\text{N}_2$  atmosphere with a heating rate of 10  $^{\circ}\text{C min}^{-1}$ . Powder X-ray diffraction (PXRD) data were recorded on a Bruker D8 ADVANCE X-ray powder diffractometer ( $\text{Cu K}\alpha$ , 1.5418 $\text{\AA}$ ) in a  $2\theta$  range of 3-70 $^{\circ}$  at room temperature. The micro morphology and the energy dispersive spectroscopy (EDS) of the samples were observed by a Quanta 250 scanning electronic microscope (SEM, FEI Company, US). The fluorescence spectra for the solid samples were measured at room temperature on an FL3-P-TCSPC spectrophotometer with a xenon lamp as the light source. The XPS spectra were recorded at room temperature using Al-K $\alpha$  radiation (1486.6 eV). Diffuse reflectance UV spectroscopy was recorded on a Varian Cary 50 spectrophotometer using a Harrick Scientific Video Barreline probe. Powder EPR experiments were performed at room temperature using a Bruker EMX Micro EPR spectrometer operating at X-band (ca. 9.84 GHz). The photochromism experiments were performed at room temperature using PLS-SME400E H1 Xenon Lamp or UV lamp (365 nm).

**Photochemical Degradation of Dye.** A 300 W halogen lamp, positioned 15 cm over the surface of the reaction solution, is employed as light source. The aqueous dispersions of catalysts are prepared by addition of 50 mg Ti-PDA to 30 mL aqueous solutions containing the dye of Methyl Orange (MO) (10 mg/L). Prior to irradiation, the suspensions are magnetically stirred in the dark for ca. 1.0 h to ensure the establishment of adsorption/desorption equilibrium of dye on the surface of the microcrystals. The dispersions are added  $\text{H}_2\text{O}_2$  (0.016 %, 5  $\mu\text{L}$ ) before irradiation. At given time intervals, 2 mL of aliquots are sampled, centrifuged, and then the supernate are analyzed by recording variations of the absorption spectra.

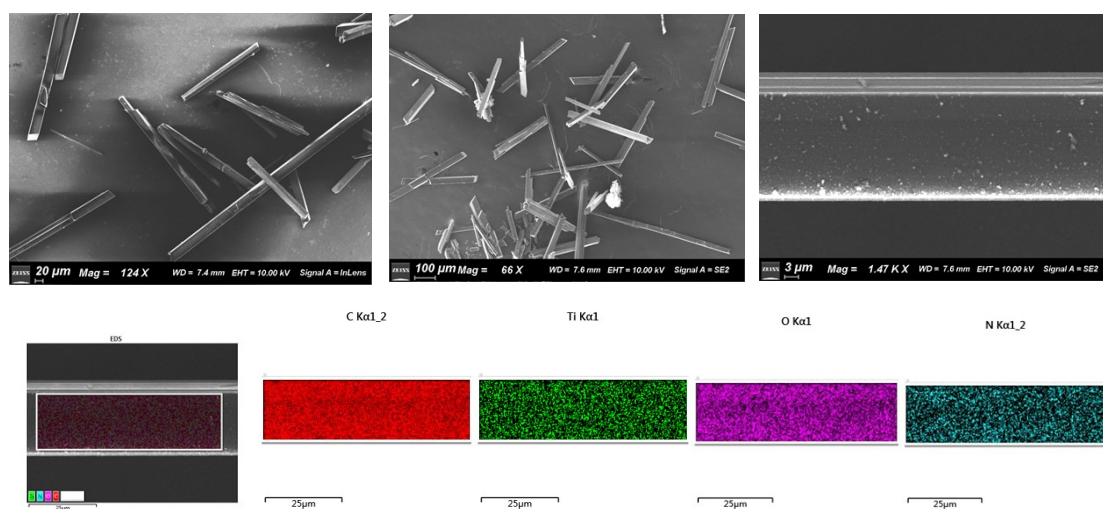

Figure S1. The SEM and EDS elemental mapping image of Ti-PDA.

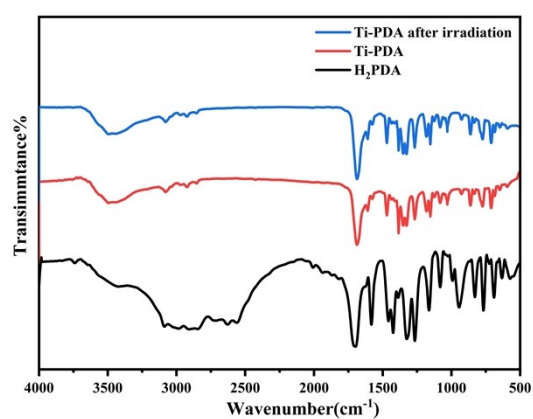

Figure S2. The Infrared spectra of Ti-PDA and H<sub>2</sub>PDA.

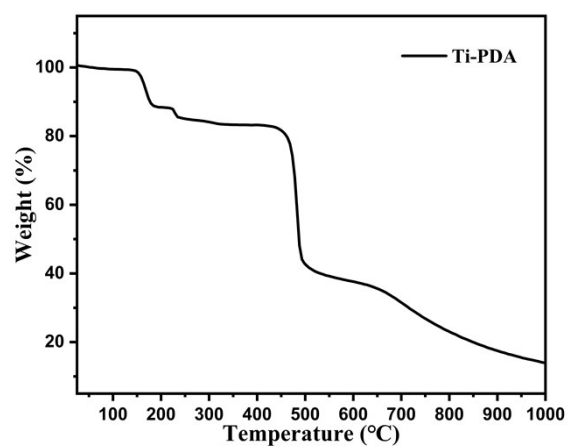

Figure S3. The thermogravimetric (TG) curve of Ti-PDA.

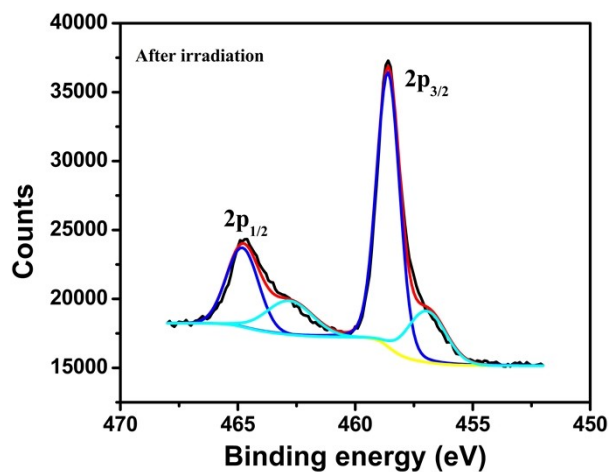

**Figure S4.** The XPS spectra for Ti 2p of the after irradiation, respectively. Black: experimental data, red curve: fitting of Ti 2p core level by synthetic peaks (blue curves: for Ti(IV)  $2p_{1/2}$  and  $2p_{3/2}$  spin states, and cyan curves: or Ti(III)  $2p_{1/2}$  and  $2p_{3/2}$  spin states), yellow curve: Shirley background.

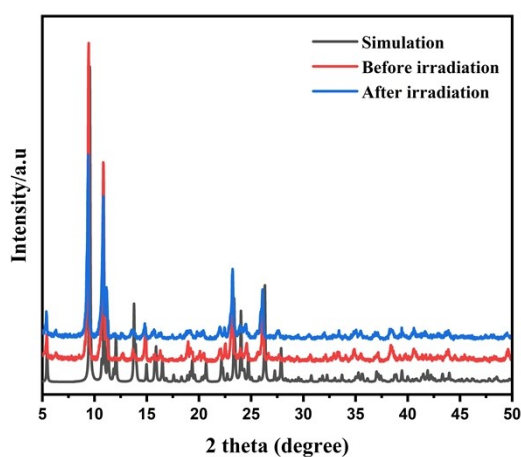

**Figure S5.** The XRD pattern of Ti-PDA.

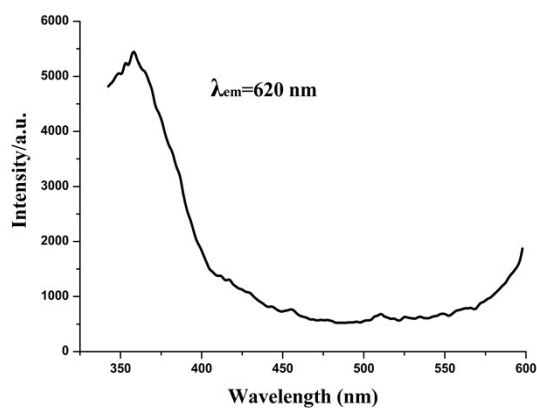

**Figure S6.** Room-temperature excitation n spectra for the Ti-PDA in the solid State.

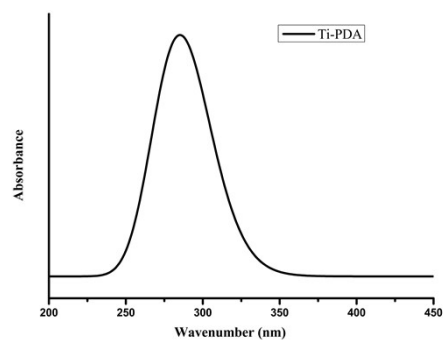

**Figure S7.** The calculated UV-vis spectrum of Ti-PDA. The absorption edge is calculated to be 450 nm.

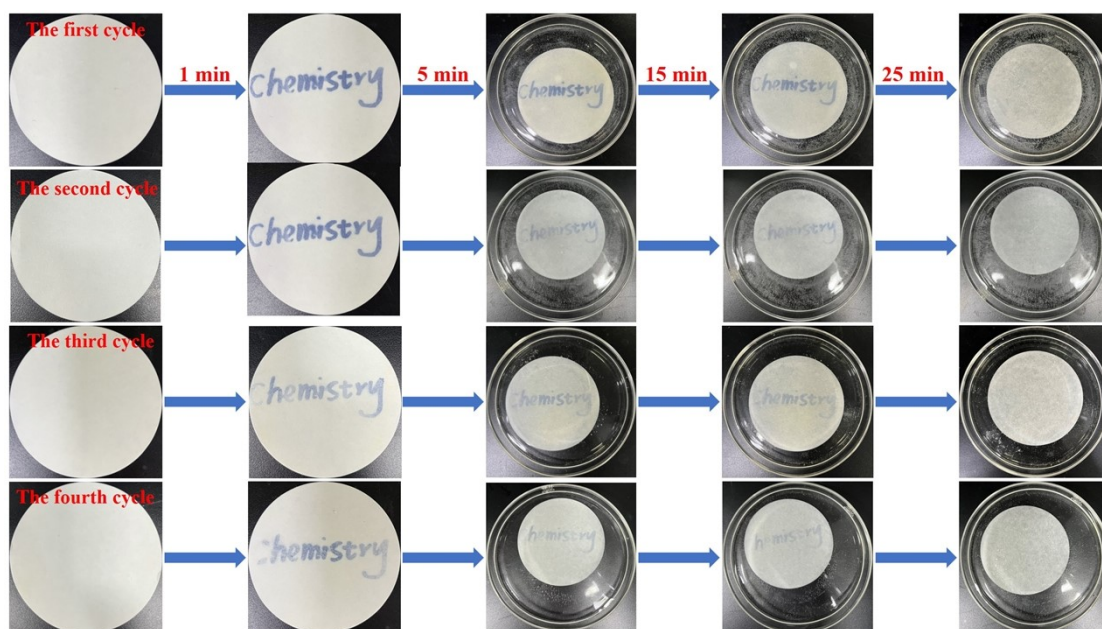

**Figure S8.** Four inkless and erasable reversible printing process.

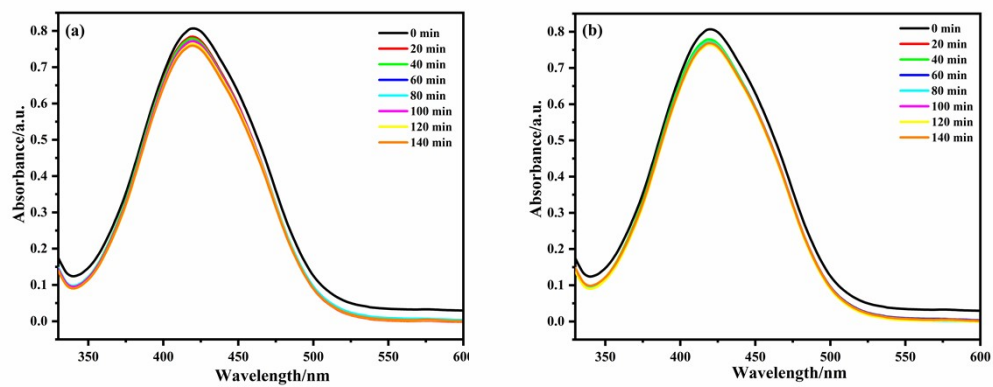

**Figure S9.** Ultraviolet spectra of MO degradation under darkness (a) or without Ti-PDA (b).

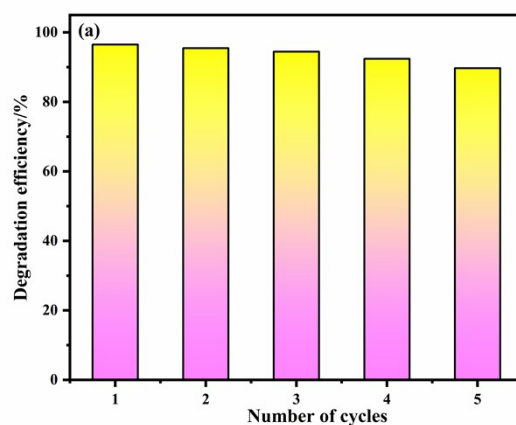

**Figure S10.** Five cycles photocatalytic degradation of MO.

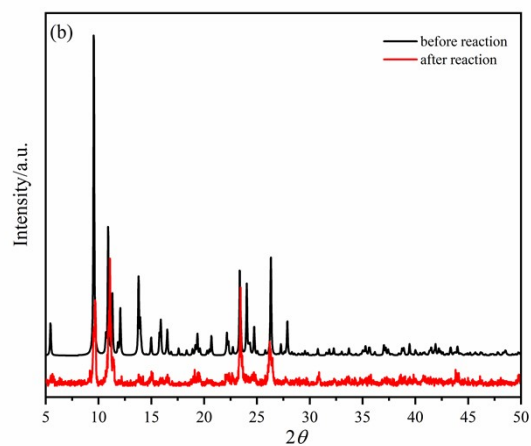

**Figure S11.** XRD spectra of before and after Ti-PDA photocatalytic degradation.

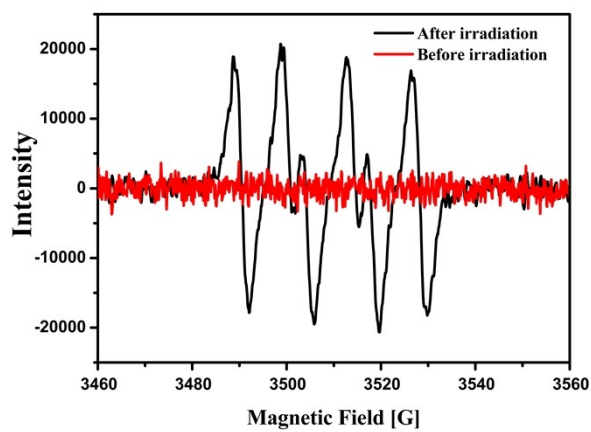

**Figure S12.** The detected EPR signal of superoxide anion radicals ( $\text{O}_2^-$ ) before and after irradiation.

**Table S1.** Selected Bond Lengths (Å) and Bond Angles (deg) for Ti-PDA.

| Ti-PDA |             |           |            |
|--------|-------------|-----------|------------|
| Ti1—O2 | 2.024 (2)   | O2—Ti1—N3 | 75.04 (8)  |
| Ti1—O7 | 2.0219 (18) | O2—Ti1—N4 | 75.62 (8)  |
| Ti1—O6 | 2.0020 (19) | O2—Ti1—N2 | 140.99 (8) |
| Ti1—O3 | 1.9952 (18) | O2—Ti1—N1 | 72.28 (8)  |
| Ti1—N3 | 2.228 (2)   | O7—Ti1—O2 | 97.32 (8)  |
| Ti1—N4 | 2.232 (2)   | O7—Ti1—N3 | 140.55 (9) |
| Ti1—N2 | 2.206 (2)   | O7—Ti1—N4 | 72.14 (8)  |
| Ti1—N1 | 2.221 (2)   | O7—Ti1—N2 | 75.17 (8)  |
